# Supplementary material for: Previous integrated or organic farming affects productivity and ecosystem N balance rather than fertilizer 15 N allocation to plants and soil, leaching, or gaseous emissions (NH 3 , N 2 O, and N 2 )
Source: Copernicus journal article supplement (doi:10.5194/egusphere-2025-292), 2025-01-30
Supplement: Supplementary file [file egusphere-2025-292-AC2-supplement.pdf]

## Author's response to Reviewers' comments #1

**Manuscript reference number:** MS No.: egusphere-2025-292

**Manuscript title:** Previous integrated or organic farming affects productivity and ecosystem N balance rather than fertilizer  $^{15}\text{N}$  allocation to plants and soil, leaching, or gaseous emissions ( $\text{NH}_3$ ,  $\text{N}_2\text{O}$ , and  $\text{N}_2$ )

Dear Editorial Team (egusphere), and Dear Referee,

We sincerely thank you for taking the time to carefully review our study and for your constructive and valuable feedback. We have revised the manuscript according to the valuable comments and thank you for the opportunity to submit a revised version of our manuscript. Please find below the detailed one-to-one responses to your comments.

| Reviewer #1                                                                                                                                                                                                                                                                                                                                                                                                                                                                                                                                                                                                                                                                                                                                                                                                                                                                                                                                                                                                                                                                                                                                                                                                                                                                                                                                                                                                                                                                                                                                                                                                                           |
|---------------------------------------------------------------------------------------------------------------------------------------------------------------------------------------------------------------------------------------------------------------------------------------------------------------------------------------------------------------------------------------------------------------------------------------------------------------------------------------------------------------------------------------------------------------------------------------------------------------------------------------------------------------------------------------------------------------------------------------------------------------------------------------------------------------------------------------------------------------------------------------------------------------------------------------------------------------------------------------------------------------------------------------------------------------------------------------------------------------------------------------------------------------------------------------------------------------------------------------------------------------------------------------------------------------------------------------------------------------------------------------------------------------------------------------------------------------------------------------------------------------------------------------------------------------------------------------------------------------------------------------|
| <p>1) This is a very important study comparing the N budget and N transformations in organic and integrated farming. <math>^{15}\text{N}</math> tracing method is applied and all the components of N-cycling are analysed, both mineral N and gaseous N forms. This very detailed study allows to almost close the N budget which is a very challenging task and authors manage this exceptionally well.</p> <p><b>Answer:</b> <i>We thank the Referee for their positive and encouraging feedback. We appreciate the recognition of the comprehensive approach taken in our study, particularly the use of the <math>^{15}\text{N}</math> tracing method and <math>^{15}\text{N}</math> gas flux method and the detailed analysis of N cycling components. We are glad that the effort to close the N budget has been acknowledged and valued.</i></p>                                                                                                                                                                                                                                                                                                                                                                                                                                                                                                                                                                                                                                                                                                                                                                              |
| <p>The manuscript is very well prepared, provides the summary of results very clearly, although this is a very complex dataset. I've read this manuscript with pleasure and interest, and I definitely support the publication in Biogeosciences. I only have some minor comments which could strengthen some technical aspects of the manuscript and the data discussion. Especially, to enhance your discussion I suggest to keep it quantitative, since you have quantified all the N fluxes you may quantitatively check all of your discussed assumptions (I give examples in the specific comments). I think it is important since your work is very valuable due to tracing and analysing all of the N budget components and, as far as I know, is probably closest to fully close the N budget.</p> <p><b>Answer:</b> <i>We sincerely thank the referee for their thoughtful and encouraging evaluation of our manuscript. We are pleased to hear that the complexity and scope of the dataset were clearly conveyed and that the manuscript was found to be both interesting and enjoyable to read. We appreciate the suggestion to further strengthen the technical aspects of the discussion by keeping it more quantitative. In response, we have carefully reviewed the discussion and incorporated additional quantitative comparisons where relevant, particularly where assumptions were made based on the data. We agree that this enhances the clarity and robustness of the conclusions and supports the value of our attempt to comprehensively trace and quantify all components of the nitrogen budget.</i></p> |
| Specific comments                                                                                                                                                                                                                                                                                                                                                                                                                                                                                                                                                                                                                                                                                                                                                                                                                                                                                                                                                                                                                                                                                                                                                                                                                                                                                                                                                                                                                                                                                                                                                                                                                     |
| <p>1. Title – is very complex and difficult to follow, containing a conclusion, which is discussed in the manuscript, but not fully sure, I would suggest a simplification and more generalisation, like eg. Comparison of N balance in integrated and organic farming: <math>^{15}\text{N}</math> tracing approach with analysis of</p>                                                                                                                                                                                                                                                                                                                                                                                                                                                                                                                                                                                                                                                                                                                                                                                                                                                                                                                                                                                                                                                                                                                                                                                                                                                                                              |

all N-compounds (...) - the title should rather contain a method applied and an aim of the study, not the main conclusion

**Answer:** Thank you for your comment on title. We agree that the title was complex and have revised it to better reflect the aim and methodology of the study, and management history of the study in line with the recommendation. We replaced the previous title with (Lines 1-3):

“Effect of preceding integrated and organic farming on  $^{15}\text{N}$  recovery and the N balance, including emissions of  $\text{NH}_3$ ,  $\text{N}_2\text{O}$ ,  $\text{N}_2$  and leaching of  $\text{NO}_3^-$ ”

2. L32 units are missing for IF ( $-8 \pm 15$ ) – not clear what this value means

**Answer:** Thank you very much for pointing this out. We have added the missing units ( $\text{kg N ha}^{-1}$ ) to the value for IF to clarify its meaning. The revised sentence now reads as follows (Lines 32-33):

“Due to the higher productivity, the cumulative N balance across all cultivation period was neutral within the limits of the measurement uncertainty for IF ( $-8 \pm 15 \text{ kg N ha}^{-1}$ )...”

3. L 34 as above N balance ( $48 \pm 14$ ).

**Answer:** We thank the referee for pointing this out. We have added the missing units ( $\text{kg N ha}^{-1}$ ) to the value for to clarify its meaning. The revised sentence now reads as follows (Lines 35-36):

“The cumulative positive N balance ( $48 \pm 14 \text{ kg N ha}^{-1}$ )...”

4. L 72-74 “The only method for in-situ measurement of  $\text{N}_2$  is the  $^{15}\text{N}$  gas flux method” – this is not true because also natural abundance isotope analyses of  $\text{N}_2\text{O}$  can be used to quantify  $\text{N}_2\text{O}$  reduction and hence – calculate the  $\text{N}_2$  flux (please check: <https://bg.copernicus.org/articles/14/711/2017/>, <https://bg.copernicus.org/articles/17/5513/2020/> ). The method has of course its limitations, but  $^{15}\text{N}$ NGF also has (e.g. the high detection limit and short time of possible measurements after tracer application).

**Answer:** Thank you very much for this important clarification. We agree that the  $^{15}\text{N}$  gas flux method is not the only in-situ approach available for estimating of  $\text{N}_2$  emissions. As correctly noted, natural abundance isotopologue analyses of  $\text{N}_2\text{O}$  can also be used to infer  $\text{N}_2$  production via  $\text{N}_2\text{O}$  reduction, as demonstrated by studies such as Lewicka-Szczebak et al. (2017 and 2020).

We have revised the statement in the manuscript to reflect this and to avoid overgeneralization. The revised sentence now reads as follows (Lines 73–77):

“Available methods for in-situ measurement of  $\text{N}_2$  fluxes, include natural abundance isotope approaches (Lewicka-Szczebak et al. 2017, 2020) and  $^{15}\text{N}$  labelling (Micucci et al., 2023). The  $^{15}\text{N}$  gas flux method ( $^{15}\text{N}$ NGF) is a well-established approach for quantifying  $\text{N}_2$  losses and considering this loss pathway together with the more easily accessible pathways enhances our understanding of N allocation in agroecosystems (Kulkarni et al., 2017; Friedl et al., 2020; Dannenmann et al., 2024)”

6. L 167-168 It would be good to describe the preparation methodology, which peripheral was used, which masses were measured, what was the detection limit and precision of the measurements.

These are very demanding analyses, so these details are necessary. Please add a citation of the preparation method applied.

**Answer:** *Thank you very much for your comment, and we appreciate the suggestion to provide more detailed methodological information. Here we have provided full information (Lines 180-187) :*

“Gas samples were analyzed using an isotope ratio mass spectrometer (Isoprime PrecisiON, Elementar UK Ltd., Stockport, UK), coupled to an isoFLOW GHG GasBench (Elementar UK Ltd.). This setup allows for subsampling of gas volumes (30  $\mu$ L) for  $^{15}\text{N}$ - $\text{N}_2$  analysis by measuring m/z 28, 29, and 30, and for analysis of  $^{15}\text{N}$ - $\text{N}_2\text{O}$  after cryogenic pre-concentration of  $\text{N}_2\text{O}$  of the remaining vial content by measurement of m/z 44, 45, and 46. Gas handling and preparation followed the protocol described in Arah, (1997); Stevens and Laughlin, (2001b); Spott et al. (2006). In-run uncertainty, i.e., the standard deviation determined from repeated analysis of reference gases for isotope ratios  $r^{29}$ ,  $r^{30}$ ,  $r^{45}$  and  $r^{46}$  amounted to  $1 \cdot 10^{-6}$ ,  $5 \cdot 10^{-7}$ ,  $7 \cdot 10^{-5}$ , and  $4 \cdot 10^{-5}$ , respectively. At the enrichment of the fertilizer added to the mesocosms (85% at), this standard deviation values relate to  $87 \mu\text{g N}_2\text{-N m}^{-2} \text{h}^{-1}$ .”

8. L 325 “52% for OF and for IF (35%)” – the bracket should be removed.

**Answer:** *Thank you very much. We have removed the brackets, and the sentence now reads as follows (Line 342):*

“During green rye cultivation, the  $^{15}\text{N}$  recovery in the soil was 52% for OF and 35% for IF...”

9. L 433-443 You discuss the possible  $\text{N}_2$  flux underestimation as the missing component of your N-balance. It would be interesting to make some estimations with real values to check this theory in practise. Eg. if we assume the 50% of  $\text{N}_2$  underestimation (as literature data suggest) will this really be sufficient to close the N budget? Just looking at the fluxes, I think it isn't. How large should be the  $\text{N}_2$  flux really to fill the missing budget? Would this amount be realistic?

**Answer:** *Thank you for this valuable comment. Based on our N balance, the unrecovered N was  $15 \text{ kg N ha}^{-1}$  for OF and  $7 \text{ kg N ha}^{-1}$  for IF. Our measured  $\text{N}_2$  fluxes were approximately  $1.0 \text{ kg N ha}^{-1}$  for both treatments. Assuming a 50% underestimation (as suggested in the literature), the actual  $\text{N}_2$  fluxes would be  $2.0 \text{ kg N ha}^{-1}$ , still leaving a gap of  $14 \text{ kg N ha}^{-1}$  for OF and  $6 \text{ kg N ha}^{-1}$  for IF. This means that method-inherent underestimation of the  $\text{N}_2$ -flux cannot close the balance, however we could detect significant fluxes only for approx. two weeks after fertilizer application. Therefore, we were not able to assess the influence of rewetting events on  $\text{N}_2$  emissions, which may significantly contribute to  $\text{N}_2$  emissions. In addition, some part of the imbalance may be due to underestimation of  $\text{NH}_3$  emissions. To take up this suggestion, we revised and rearranged the text to (Lines 459-474):*

“... Despite the amount of  $\text{N}_2$  losses quantified in this study agreeing with the past studies, the direct field measurement of  $\text{N}_2$  fluxes in addition to all other relevant loss pathways did not result in a closed  $^{15}\text{N}$  balance, with the average imbalance being  $15$  and  $7 \text{ kg N ha}^{-1}$  for OF and IF, respectively. While some part of the unrecovered  $^{15}\text{N}$  may be due to an underestimation of  $\text{NH}_3$  loss,  $\text{N}_2$  emissions may be underestimated as well (Yankelzon et al., 2024a). Heterogeneous  $^{15}\text{N}$  distribution in the microplot soil resulting from surface or slit

application of the slurry and  $^{15}\text{N}_2$  diffusion and storage in subsoil layers contributes to the underestimation of  $\text{N}_2$  flux rates. These complications associated with  $^{15}\text{N}$  labelling were discussed in previous studies which indicate that fluxes may be underestimated by up to 30-50% (Vanden Heuvel et al., 1988; Arah, 1997; Well et al., 2018; Well et al., 2019; Friedl et al., 2020; Micucci et al., 2023; Dannenmann et al., 2024). Even assuming a 50% underestimation,  $\text{N}_2$  emissions after fertilization are in the range of  $2 \text{ kg N ha}^{-1}$ , indicating that the method-inherent potential underestimation alone cannot close the N-balance.

However, the short coverage of the direct  $\text{N}_2$  measurements, which is due to the short period of time during which the isotopic enrichment of the N pool subject to denitrification is sufficiently high so that the  $\text{N}_2$  flux can be detected, may be an additional source for underestimation. Consequently, we cannot exclude that additional  $^{15}\text{N}$  in  $\text{N}_2$  is emitted in the months following fertilizer application, particularly during rewetting events or towards the end of the growing season when plants decrease their water uptake and water content increases, as observed by Almaraz et al. (2024)."

10. L 450 "ratio in this study ranged from 0.01 to 1.00" to 1? Is this a mistake? this would mean no  $\text{N}_2$ , only  $\text{N}_2\text{O}$  - I think you do not have such case,  $\text{N}_2$  flux is always much higher than  $\text{N}_2\text{O}$  flux

**Answer:** Thank you for pointing this out. After revising the data, we confirm that the maximum  $\text{N}_2\text{O}/(\text{N}_2\text{O} + \text{N}_2)$  ratio was approximately [0.01 to 0.45], not 1.00. The text has been corrected to reflect this and the figure as well. The sentences now read as (Line 301 and line 480):

"The ratio of total  $\text{N}_2\text{O} : (\text{N}_2 + \text{N}_2\text{O})$  showed a similar progression over time for both sites, ranging from 0.01 to 0.45."

"The  $\text{N}_2\text{O} : (\text{N}_2 + \text{N}_2\text{O})$  ratio in this study ranged from 0.01 to 0.45 across both sites using different slurry application techniques...."

11. L 519 – 522 Did you try to extrapolate these  $\text{N}_2$  and  $\text{N}_2\text{O}$  losses? It is possible to try some extrapolation and asses if this could explain the missing  $^{15}\text{N}$ ? Eg. Assuming theoretical values of eg. half detection limit for the further period (after these losses can be detected) ? Would this be significant in the N budget change?

**Answer:** Thank you for this comment. We agree that such extrapolation is useful for  $\text{N}_2$  as the magnitude of these emissions is relevant for the budget, but cumulative  $\text{N}_2\text{O}$  emissions are much smaller. In addition, please note that we indicate that unrecovered  $\text{N}_2$  is not the only reason for an imbalance in the N budget ( $\text{NH}_3$  emission, other uncertainties as explained in subsequent section). For this reason, we revised the manuscript as follows (Lines 550-560):

"The only measurements that don't cover the whole cultivation period are those of  $\text{N}_2\text{O}$  and  $\text{N}_2$ , suggesting that underestimation of these N losses due to coverage of measurements of only a fraction of the whole cultivation period could explain the unrecovered N losses. Since  $\text{N}_2\text{O}$  emissions are approximately a factor of 10 lower than  $\text{N}_2$  emissions (Scheer et al., 2020),  $\text{N}_2$  emissions may have contributed the main part to the unrecovered losses. Assuming a background  $\text{N}_2$  emission rate of  $87 \mu\text{g m}^{-2} \text{h}^{-1}$ , which is equivalent to an emission if measured isotope ratios are increased by one standard deviation compared to the background, 0.7, 2.5 and  $3.7 \text{ kg N}_2\text{-N ha}^{-1}$  are released during green rye, maize and ryegrass cultivation, respectively. Such a background emission together with slightly underestimated  $\text{NH}_3$  emissions could explain the unrecovered  $\text{N}_2$  losses for IF. Overall recovery for OF was close to or lower than that of IF, suggesting that for the OF, additional  $\text{N}_2$  was emitted during the

cultivation period, which could be due to more frequent denitrification events caused by higher soil bulk density (Table 1, Luo et al., 2000; Hamonts et al., 2013)."

12. 547 – 549 "reduction of uncertainty for determination of (...), N<sub>2</sub> and N<sub>2</sub>O emission is not in view" - this is not fully true, because there are some ideas of enhancement of the <sup>15</sup>NGF for in situ measurements (see <https://link.springer.com/article/10.1007/s00374-024-01806-z> ) , so that maybe better sensitivity for N<sub>2</sub> can be attained, but with large costs and efforts.

**Answer:** *We sincerely appreciate the reviewer's insightful feedback and for directing us to the recent methodological advancements by Eckeï et al. (2025). We agree that the improved <sup>15</sup>N gas flux method (<sup>15</sup>NGF+), which combines <sup>15</sup>N labelling with helium-oxygen flushing to reduce atmospheric N<sub>2</sub> background, represents a significant step toward enhancing sensitivity for N<sub>2</sub> detection in field-scale studies. Their work demonstrates that lowering the N<sub>2</sub> background to <2% enables more precise quantification of N<sub>2</sub> and N<sub>2</sub>O fluxes, particularly when paired with production-diffusion modelling to account for subsoil processes.*

*However, as Eckeï et al. (2025) emphasize, practical challenges remain, including the high technical complexity, specialized equipment requirements, and labor-intensive protocols (e.g., prolonged gas flushing, isotopic analyses, and model corrections). These constraints currently limit the method's widespread adoption for routine monitoring or large-scale assessments. Consequently, while <sup>15</sup>NGF advances our capacity to study denitrification dynamics, its application remains resource-intensive and context-dependent, with unresolved uncertainties in scaling results across heterogeneous field conditions.*

*We have revised our statement in the manuscript, which now reads as follows (Lines 582-590):*

*"Following the same line of argumentation, reduction in the uncertainty of the direct measurement of N balance components, i.e., losses through leaching, NH<sub>3</sub>, N<sub>2</sub> and N<sub>2</sub>O could help resolving differences more accurately. While recent advancements, such as the improved <sup>15</sup>N gas flux method (<sup>15</sup>NGF+) demonstrate potential for enhanced sensitivity in quantifying N<sub>2</sub> emissions under field conditions (Eckeï et al., 2025), such approaches are expensive and technically challenging which will delay their use in studies targeting complete N balances. Since the same applies to significant reduction of uncertainty in determining leaching losses, NH<sub>3</sub> volatilization, and N<sub>2</sub>O emissions, it appears like these loss pathways were not markedly influenced by management history given the current measurement frameworks."*
